# Supplementary material for: Urea-induced supramolecular self-assembly strategy to synthesize wrinkled porous carbon nitride nanosheets for highly-efficient visible-light photocatalytic degradation
Source: Royal Society of Chemistry journal article supplement (doi:10.1039/d1ra03524j), 2021-01-01
Supplement: d1ra03524j1.pdf [file d1ra03524j1.pdf]

Electronic Supplemental Information for

**Urea-induced Supramolecular Self-assembled Strategy to Synthesize  
Wrinkled Porous Carbon Nitride Nanosheets for Highly-efficient Visible-  
light Photocatalytic Degradation**

Rui Li,<sup>a</sup> Xianbao Cui,<sup>b</sup> Jingtao Bi,<sup>a</sup> Xiongtao Ji,<sup>a</sup> Xin Li,<sup>a</sup> Na Wang,<sup>a</sup> Yunhai Huang,<sup>a</sup> Xin  
Huang<sup>a,c,\*</sup> and Hongxun Hao<sup>a,c,\*</sup>

<sup>a</sup> *National Engineering Research Center of Industry Crystallization Technology, School of  
Chemical Engineering and Technology, Tianjin University, Tianjin 300072, China;*

<sup>b</sup> *State Key Laboratory of Chemical Engineering, School of Chemical Engineering and  
Technology, Tianjin University, Tianjin 300072, China*

<sup>c</sup> *Co-Innovation Center of Chemical Science and Engineering, Tianjin 300072, China*

\* Email: hongxunhao@tju.edu.cn (H. Hao)

x\_huang@tju.edu.cn

(X.

Huang)

## Table of Contents

**Fig. S1. Pictures of UD3, UD0 and DCN.**

**Fig. S2. FTIR spectra and XRD patterns of raw DCDA and obtained intermediates.**

**Table S1. TOC data during degradation.**

**Fig. S3. XRD and FTIR of UD3 before and after photocatalytic experiment.**

**Fig. S4. SEM and TEM images of UD1, UD2 and UD4.**

**Table S2.  $S_{\text{BET}}$ , BJH average pore diameter and BJH pore volume of DCN, UD0 and UD3 samples.**

**Fig. S5. XRD patterns and FTIR spectra of DCN, UD0 and UD3.**

**Fig. S6. High-resolution XPS spectra and solid-state  $^{13}\text{C}$  NMR spectra for DCN, UD0 and UD3.**

**Fig. S7. Near surface region chemical compositions of DCN, UD0 and UD3 determined from XPS survey spectra.**

**Table S3. The fluorescent lifetime of DCN, UD0 and UD3.**

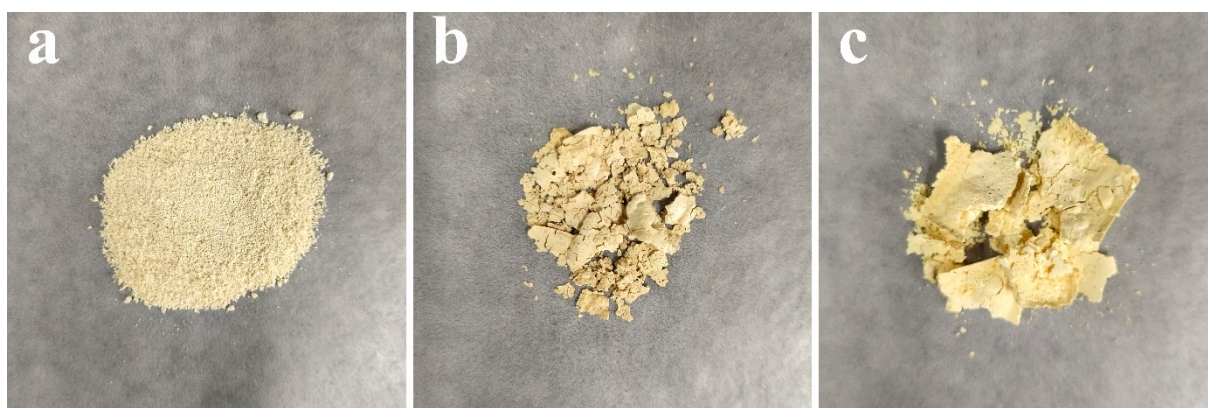

**Fig. S1.** (a) Light-yellow powder of UD3. Yellow blocky solid of (b) UD0 and (c) DCN before grinding.

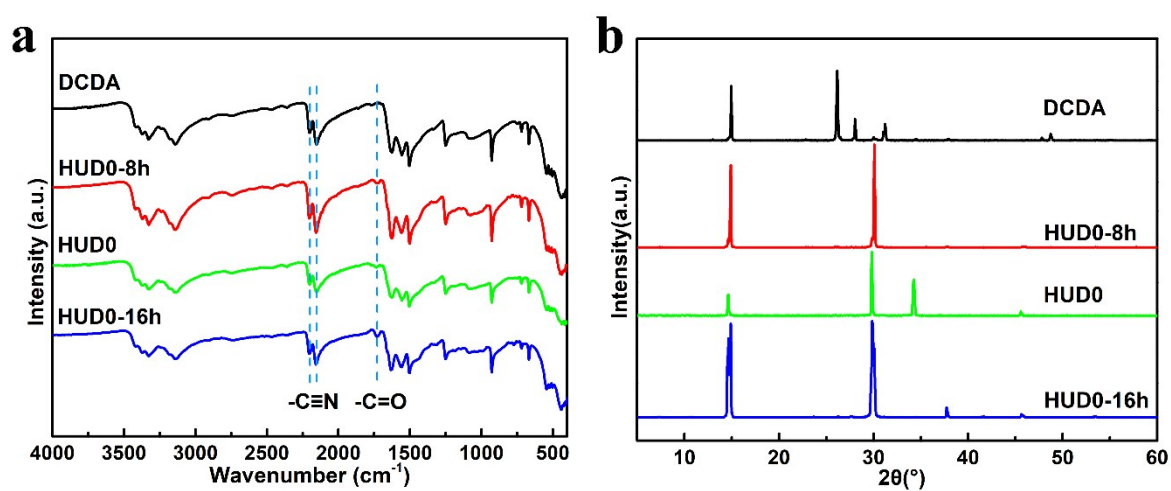

**Fig. S2.** (a) FTIR spectra and (b) XRD patterns of raw DCDA and obtained intermediates.

**Table S1.** TOC data during degradation.

| t/min | TOC (mg/L) | TOC removal rate (%) |
|-------|------------|----------------------|
| 0     | 162.3      | 0                    |
| 60    | 8.4        | 94.8                 |

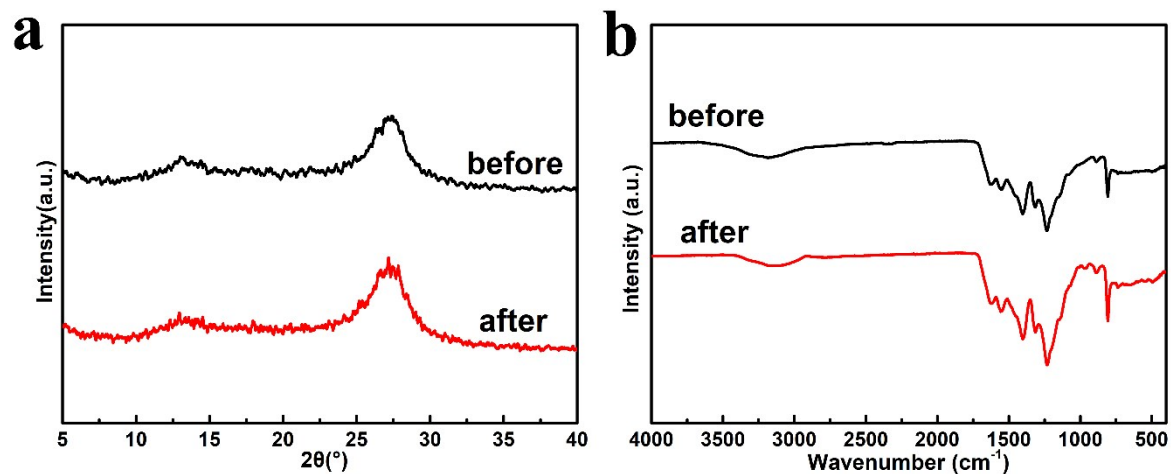

**Fig. S3.** (a) XRD patterns and (b) FTIR spectra of UD3 before and after photocatalytic experiment.

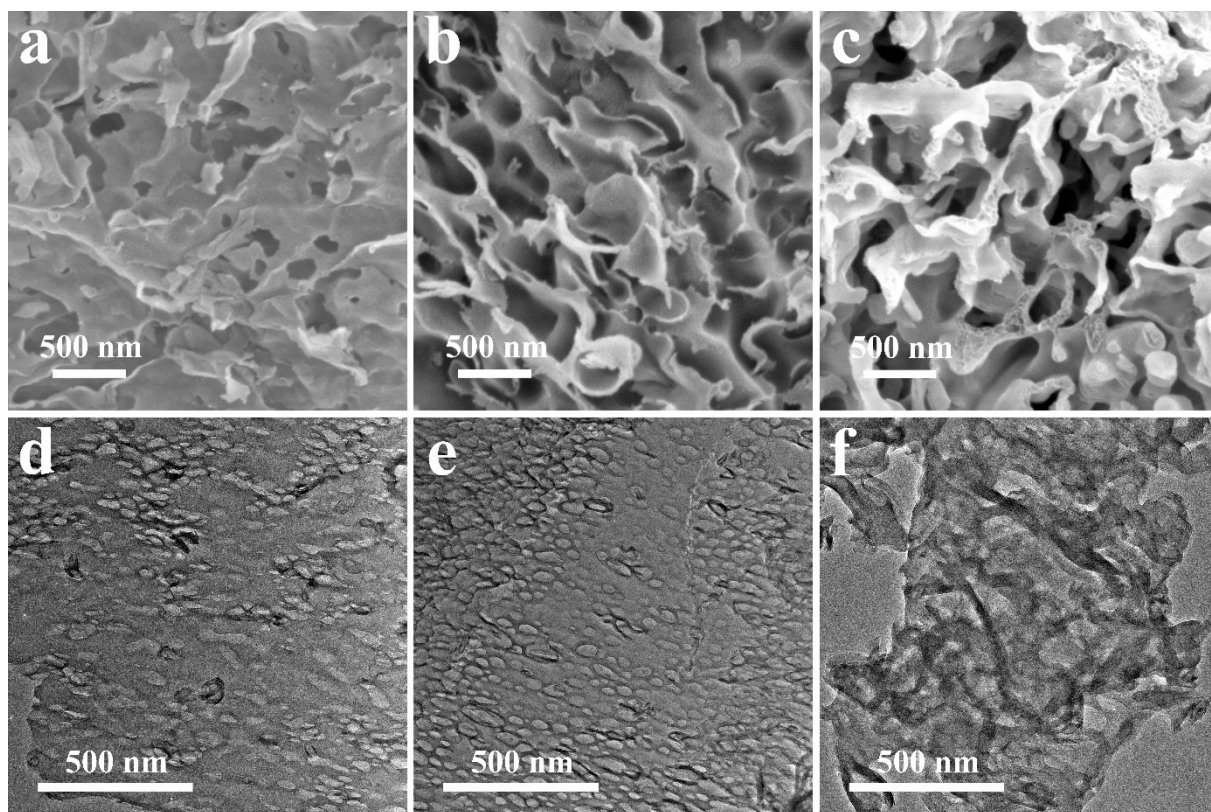

**Fig. S4.** SEM images of (a) UD1, (b) UD2, (c) UD4 and TEM images of (d) UD1, (e) UD2, (f) UD4.

**Table S2.**  $S_{BET}$ , BJH average pore diameter and BJH pore volume of DCN, UD0 and UD3 samples.

| Photocatalyst | $S_{BET}$ (m <sup>2</sup> /g) | Average pore diameter (nm) | Average pore volume (cm <sup>3</sup> /g) |
|---------------|-------------------------------|----------------------------|------------------------------------------|
| DCN           | 6.730                         | 8.05                       | 0.045                                    |
| UD0           | 7.277                         | 10.32                      | 0.069                                    |
| UD3           | 36.457                        | 6.63                       | 0.149                                    |

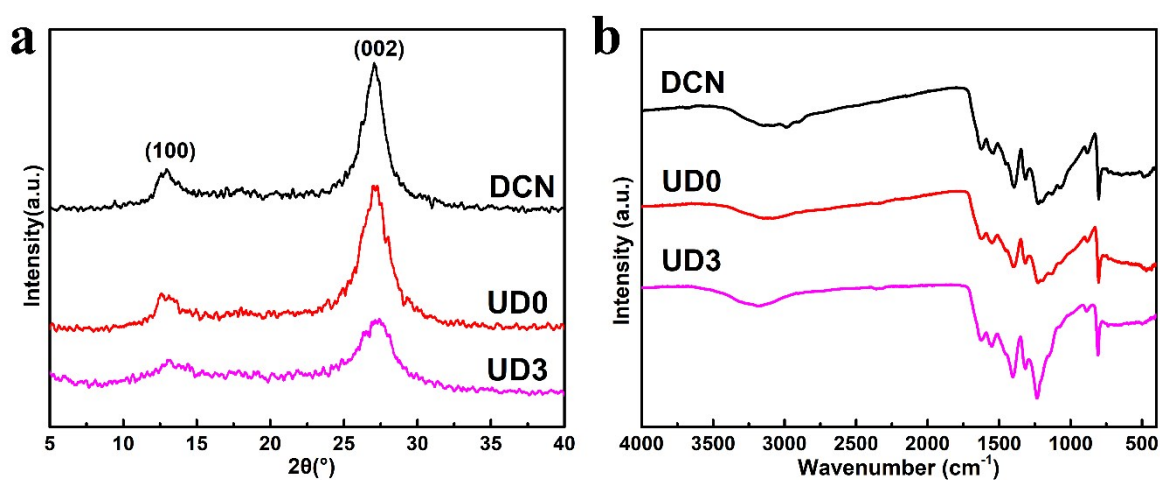

**Fig. S5.** (a) XRD patterns and (b) FTIR spectra of DCN, UD0 and UD3.

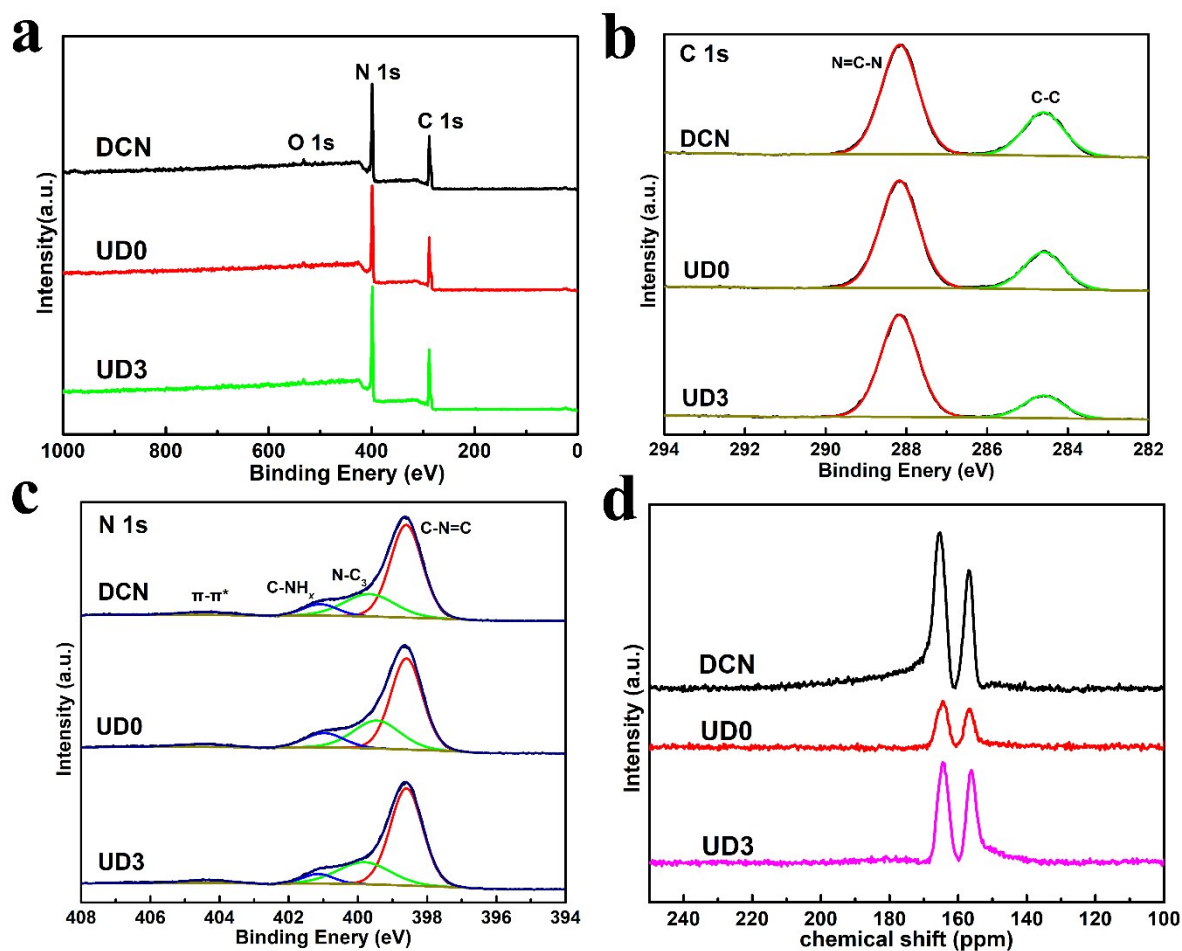

**Fig. S6.** High-resolution XPS spectra of (a) survey, (b) C 1s, (c) N 1s and (d) solid-state  $^{13}\text{C}$  NMR spectra for DCN, UD0 and UD3.

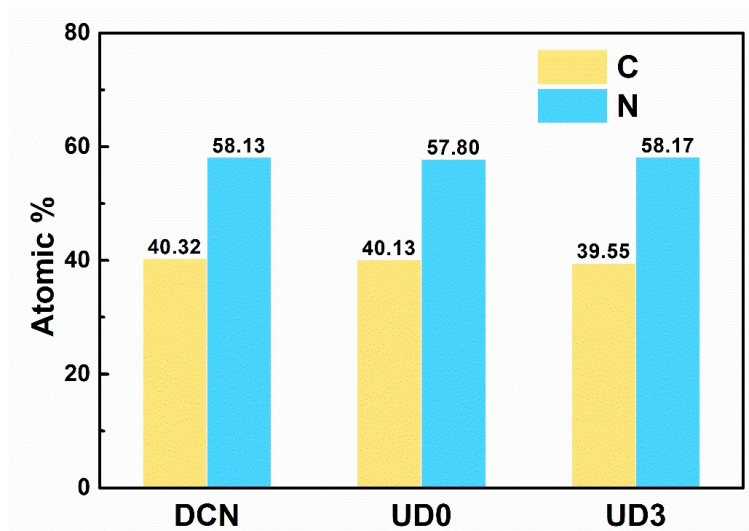

**Fig. S7.** Near surface region chemical compositions of DCN, UD0 and UD3 determined from XPS survey spectra and quantification procedures based on relative C 1s and N 1s peak areas, respectively.

**Table S3.** The fluorescent lifetime of DCN, UD0 and UD3.

| Samples | $A_1$  | $\tau_1$ (ns) | $A_2$  | $\tau_2$ (ns) |
|---------|--------|---------------|--------|---------------|
| DCN     | 6081.3 | 2.4           | 1886.6 | 11.5          |
| UD0     | 5867.3 | 2.9           | 1996.4 | 14.6          |
| UD3     | 7168.9 | 2.8           | 1399.6 | 15.4          |
